# Supplementary material for: Pulmonary Group 2 Innate Lymphoid Cell Phenotype Is Context Specific: Determining the Effect of Strain, Location, and Stimuli
Source: PubMed Central journal article supplement (PMC6987460; doi:10.3389/fimmu.2019.03114), 2020-01-22
Supplement: Table_1.pdf [file Table_1.pdf]

**Table S1. Antibodies used to identify and phenotype mouse ILC2s.**

| Antigen | Clone     | Fluorochrome            | Manufacturer                      | Dilution | Stock concentration | Working concentration |
|---------|-----------|-------------------------|-----------------------------------|----------|---------------------|-----------------------|
| CD11b   | M1/70     | APC                     | Biolegend                         | 1:200    | 0.2mg/mL            | 1µg/mL                |
| CD11c   | N418      | APC                     | Biolegend                         | 1:100    | 0.2mg/mL            | 2µg/mL                |
| CD127   | A7R34     | BV711                   | Biolegend                         | 1:100    | 0.2mg/mL            | 2µg/mL                |
| CD19    | eBio 1D3  | APC                     | Biolegend                         | 1:100    | 0.2mg/mL            | 2µg/mL                |
| CD25    | PC61      | BV510                   | Biolegend                         | 1:50     | 0.5mg/mL            | 10ug/mL               |
| CD3e    | 145-2C11  | APC Cy7<br>(eFlour 780) | Biolegend                         | 1:100    | 0.2mg/mL            | 2µg/mL                |
| CD45    | 30-F11    | AF700                   | Biolegend                         | 1:100    | 0.5mg/mL            | 5ug/mL                |
| CD5     | 53-7.3    | APC                     | Biolegend                         | 1:100    | 0.2mg/mL            | 2µg/mL                |
| CD90.2  | 53-2.1    | BV605                   | Biolegend                         | 1:100    | 0.2mg/mL            | 2µg/mL                |
| F4/80   | BM8       | APC                     | Biolegend                         | 1:100    | 0.2mg/mL            | 2µg/mL                |
| FCεR1   | MAR1      | APC                     | Biolegend                         | 1:100    | 0.2mg/mL            | 2µg/mL                |
| GATA3   | TWAJ      | PERCP e710              | Thermo<br>Fisher/<br>eBiosciences | 1:25     | 60µg/mL             | 2.4µg/mL              |
| GR-1    | RB6-8C5   | APC                     | Biolegend                         | 1:100    | 0.2mg/mL            | 2µg/mL                |
| KLRG1   | 2F1/KLRG1 | PE Cy7                  | Biolegend                         | 1:100    | 0.2mg/mL            | 2µg/mL                |
| IL-13   | eBio 13A  | PE                      | Thermo<br>Fisher/<br>eBiosciences | 1:100    | 0.2mg/mL            | 2µg/mL                |

|         |          |                   |                                   |       |          |          |
|---------|----------|-------------------|-----------------------------------|-------|----------|----------|
| IL-5    | TRFK5    | BV421             | Biolegend                         | 1:100 | 0.2mg/mL | 2µg/mL   |
| Nkp46   | 29A1.4   | PE/Dazzle™<br>594 | Biolegend                         | 1:100 | 0.2mg/mL | 2µg/mL   |
| SCA-1   | D7       | BV785             | Biolegend                         | 1:100 | 0.2mg/mL | 2µg/mL   |
| ST2     | DJ8      | FITC              | MD<br>Biosciences                 | 1:100 | 1mg/mL   | 10µg/mL  |
| TCRβ    | H57-597  | APC               | Biolegend                         | 1:100 | 0.2mg/mL | 2µg/mL   |
| TCRγδ   | eBio GL3 | APC               | Thermo<br>Fisher/<br>eBiosciences | 1:100 | 0.2mg/mL | 2µg/mL   |
| TER-119 | TER-119  | APC               | Biolegend                         | 1:100 | 0.2mg/mL | 2µg/mL   |
| ST2     | DJ8      | FITC              | MD<br>Biosciences                 | 1:100 | 1mg/mL   | 100µg/mL |
| ST2     | DJ8      | PE                | MD<br>Biosciences                 | 1:100 | 1mg/mL   | 100µg/mL |
